# Supplementary material for: HADC5 deacetylates MKL1 to dampen TNF-α induced pro-inflammatory gene transcription in macrophages
Source: PubMed Central journal article supplement (PMC5706870; doi:10.18632/oncotarget.21670), 2017-10-09
Supplement: oncotarget-08-94235-s001.pdf [file oncotarget-08-94235-s001.pdf]

# HADC5 deacetylates MKL1 to dampen TNF- $\alpha$ induced pro-inflammatory gene transcription in macrophages

## SUPPLEMENTARY MATERIALS

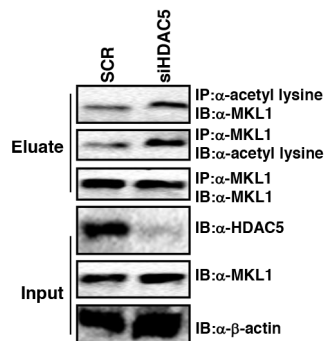

**Supplementary Figure 1:** RAW264 cells were transfected with siRNA targeting HDAC5 or scrambled siRNA (SCR). Immunoprecipitation assay was performed with indicated antibodies.

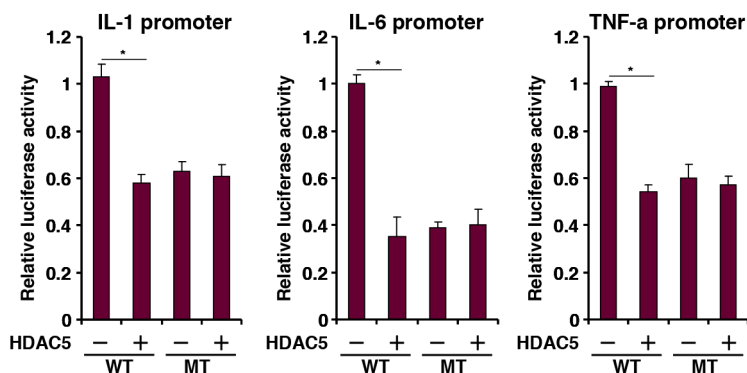

**Supplementary Figure 2:** Different promoter constructs were transfected into HEK293 cells with wild type (WT) MKL1, acetylation-defective (MT) MKL1, and/or HDAC5 expression construct as indicated. Luciferase activities were normalized by protein concentration and GFP fluorescence.

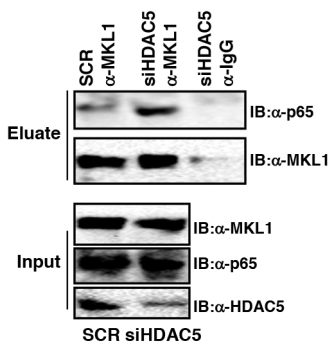

**Supplementary Figure 3:** RAW264 cells were transfected with siRNA targeting HDAC5 or scrambled siRNA (SCR) followed by treatment with TNF- $\alpha$  (10ng/ml). Immunoprecipitation was performed with anti-MKL1 or IgG.
